# Supplementary material for: DNA-stabilized silver nanoclusters with guanine-enhanced fluorescence as a novel indicator for enzymatic detection of cholesterol
Source: Royal Society of Chemistry journal article supplement (doi:10.1039/c3ay40118a), 2013-01-01
Supplement: c3ay40118a.pdf [file c3ay40118a.pdf]

## Electronic Supplementary Information (ESI)

### **DNA-stabilized Silver Nanoclusters with Guanine-enhanced Fluorescence as a Novel Indicator for Enzymatic Detection of Cholesterol**

**Min Duan, Yunlin Peng, Liangliang Zhang, Xiangyu Wang, Jia Ge, Jianhui Jiang\*, Ruqin Yu\***

State Key Laboratory of Chemo/Biosensing and Chemometrics, College of Chemistry and Chemical Engineering, Hunan University, Changsha, 410082, P. R. China

To whom correspondence should be addressed.

Tel: +86 731 88822577.

Fax: +86 731 88822577.

E-mail address: rquy@hnu.edu.cn (Ruqin Yu)

jianhuijiang@hnu.edu.cn (Jianhui Jiang)

**Table S1** The sequences of DNA oligonucleotides used in this work.

|      | DNA sequences (5' → 3') |
|------|-------------------------|
| P0   | CCCTAACTCCCC            |
| P1GR | CCCTAACTCCCCG           |
| P2GR | CCCTAACTCCCCGG          |
| P3GR | CCCTAACTC CCCGGG        |
| P4GR | CCCTAACTCCCCGGGG        |
| P1GL | G CCCTAACTCCCC          |
| P2GL | GGCCCTAACTCCCC          |

## Supplementary Figures

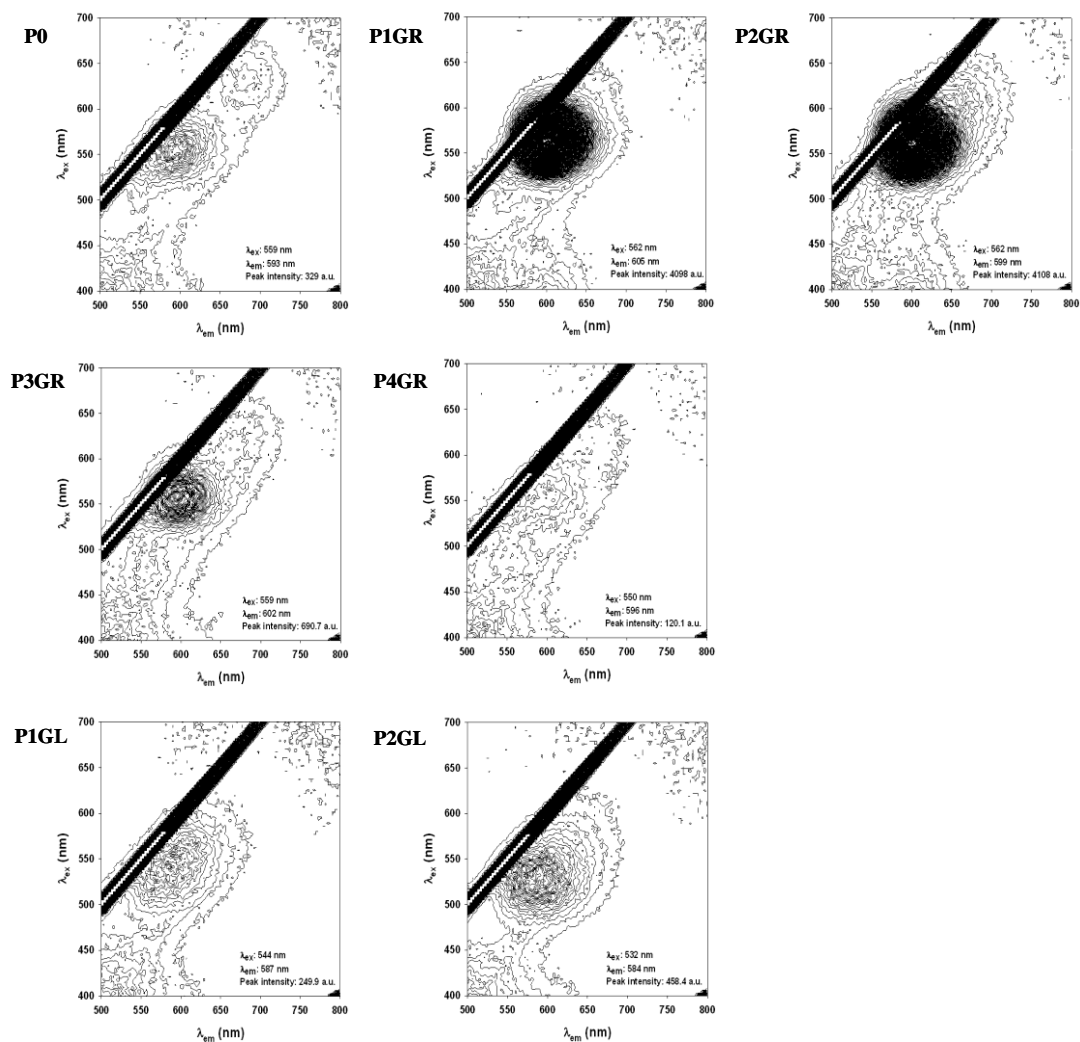

**Fig.S1** Contour maps fluorescence of DNA-Ag NCs with different guanine bases modification.

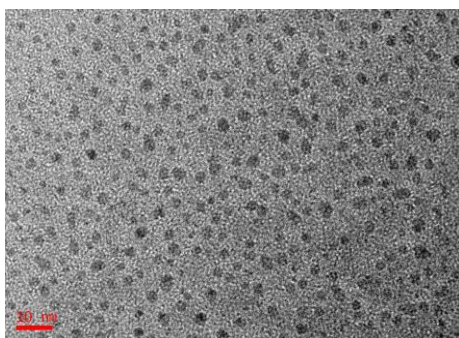

**Fig.S2** TEM image of G-DNA-Ag NCs.

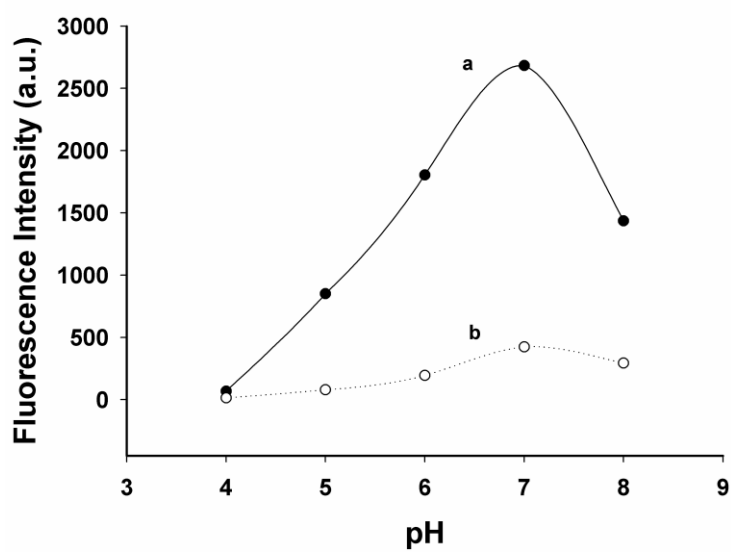

**Fig.S3** The effect of pH on the sensor performance: in the absence of  $\text{H}_2\text{O}_2$  (a), in the presence of  $100 \mu\text{M H}_2\text{O}_2$  (b).

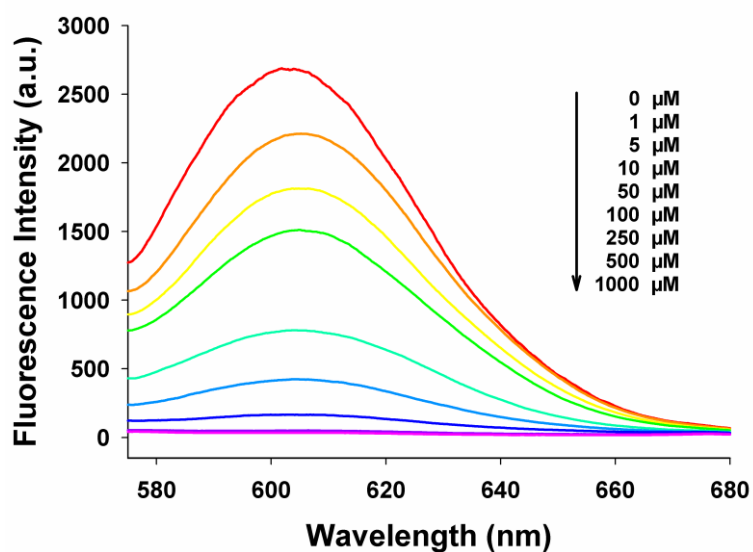

**Fig.S4** Fluorescence spectra of G-DNA-Ag NCs after the treatment of different concentrations of H<sub>2</sub>O<sub>2</sub>.

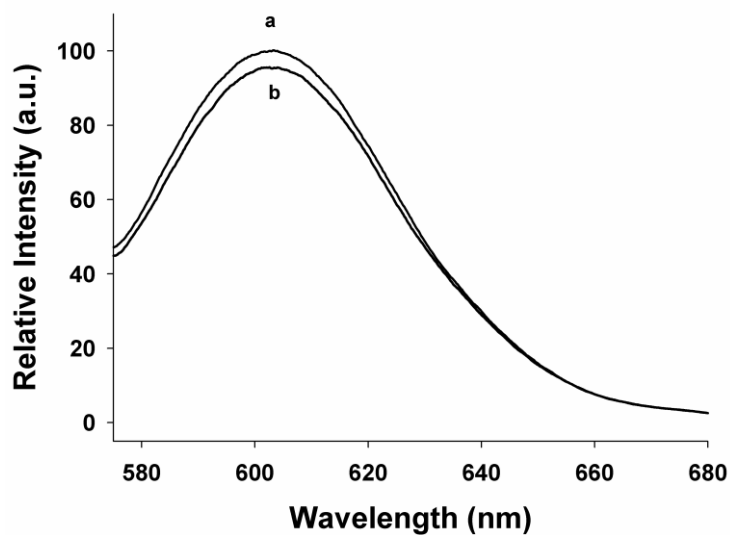

**Fig.S5** The effect of cholesterol on the fluorescence intensity of G-DNA-Ag NCs without cholesterol oxidase: (a) in the absence of cholesterol; (b) in the presence of 200 μM cholesterol.

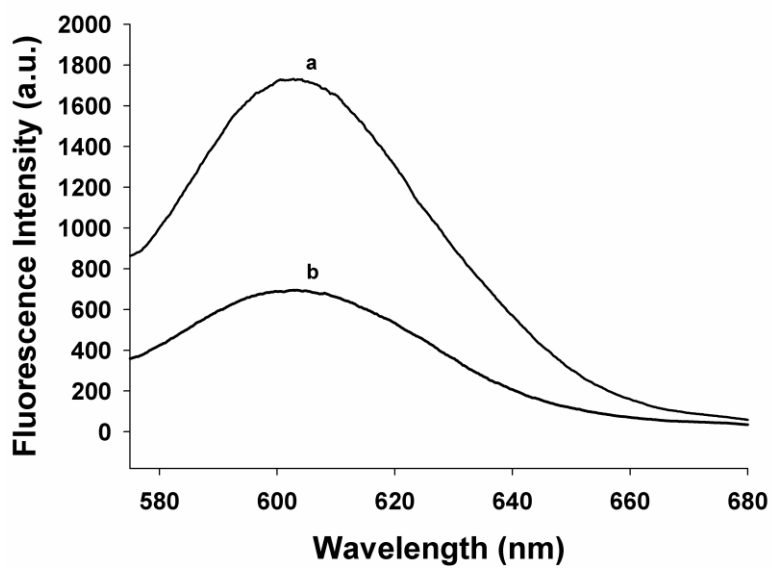

**Fig.S6** The fluorescence response in the absence (a) or presence (b) of 100  $\mu\text{M}$  cholesterol in diluted human serum (1%).
